# Supplementary material for: Three-dimensional hierarchical ZnCo2O4@C3N4-B nanoflowers as high-performance anode materials for lithium-ion batteries
Source: Royal Society of Chemistry journal article supplement (doi:10.1039/d0ra05203e), 2020-01-01
Supplement: d0ra05203e1.pdf [file d0ra05203e1.pdf]

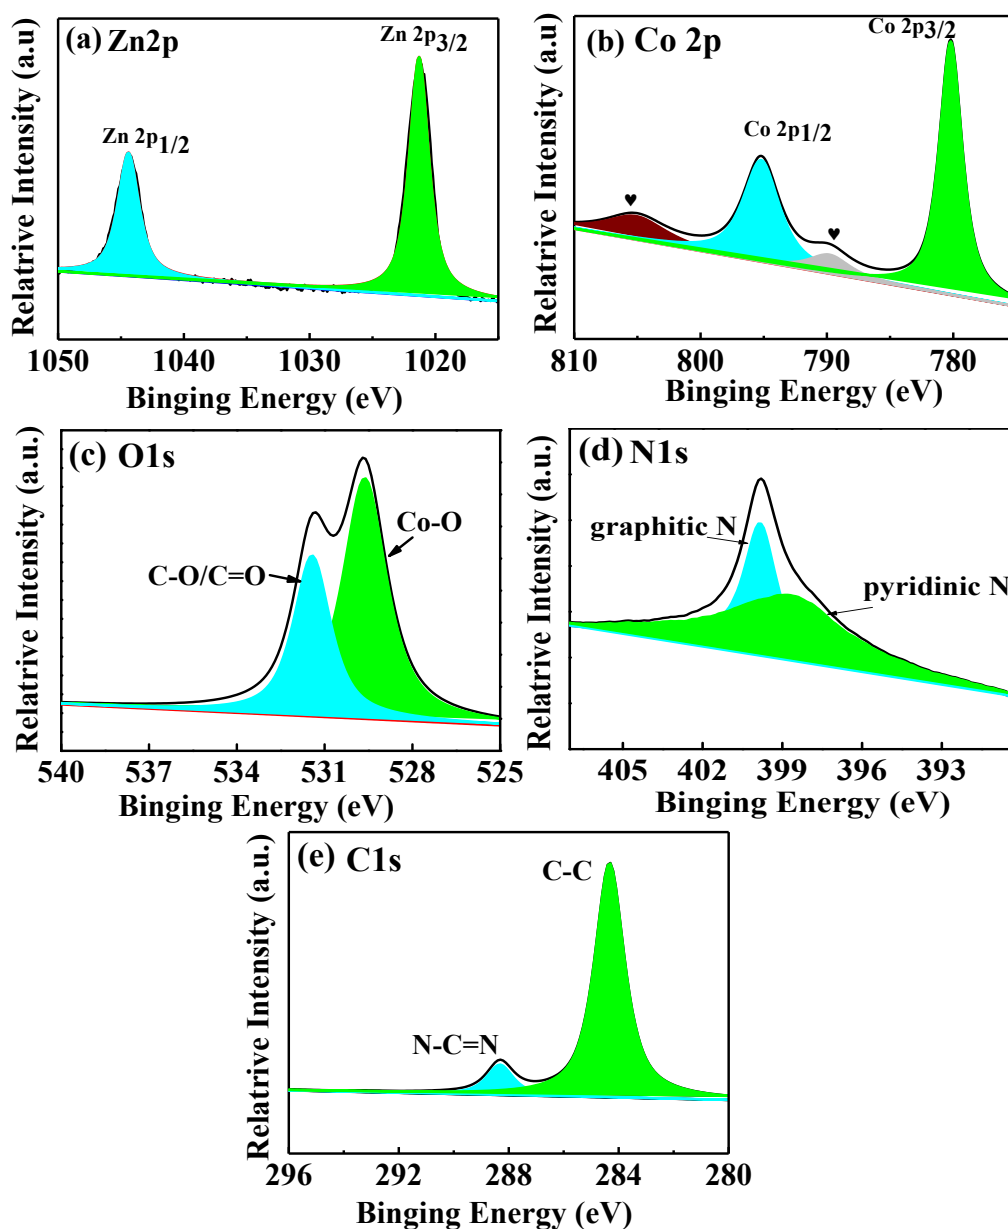

**Figure S1** XPS spectra of Zn2p, Co2p, O 1s, C1s and N1s spectrum of the sample of ZCO@C<sub>3</sub>N<sub>4</sub>

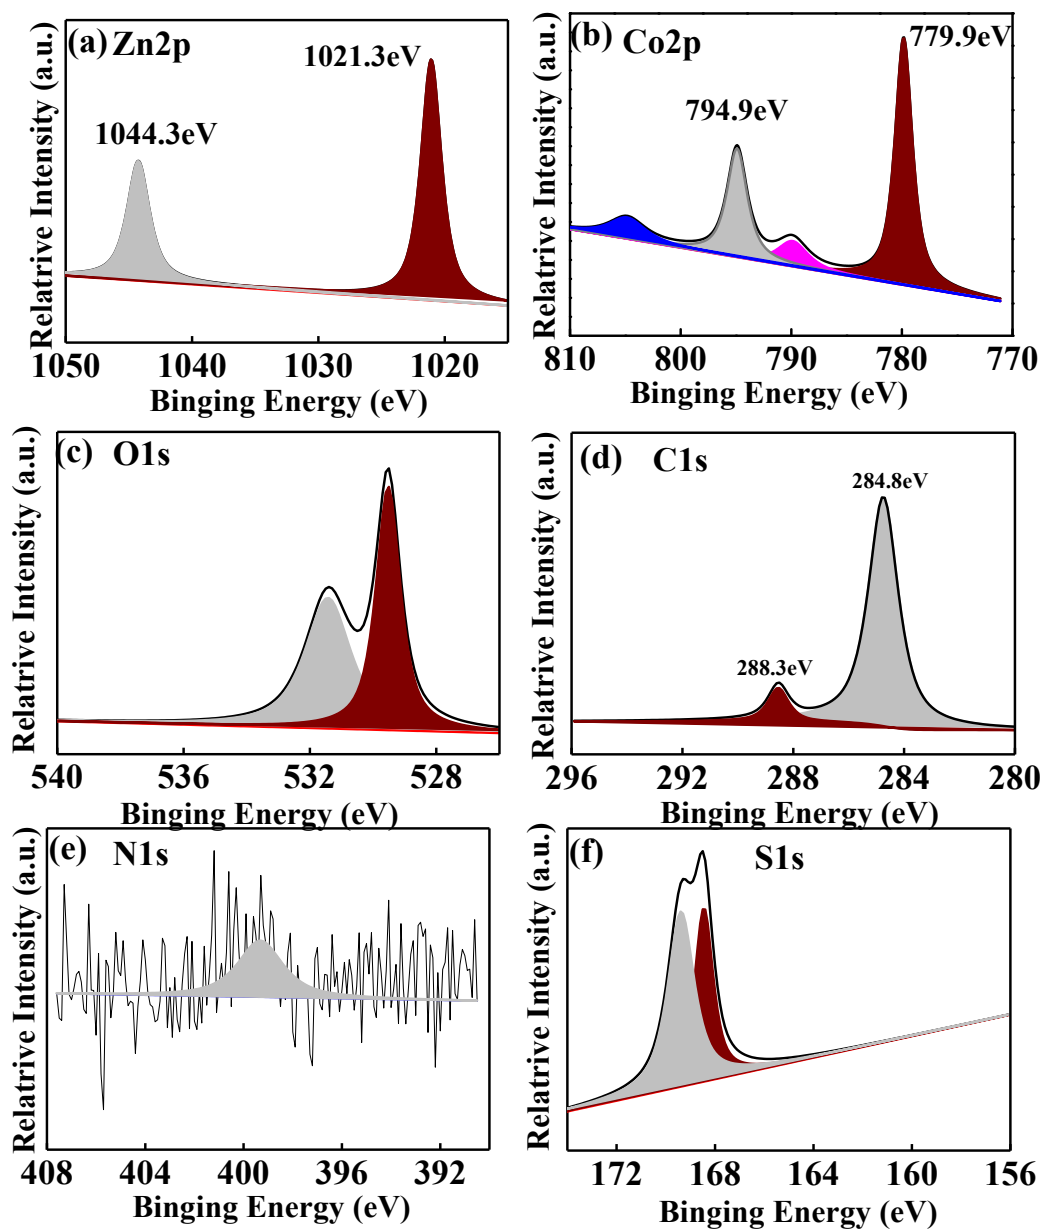

**Figure S2** XPS spectra of Zn2p, Co2p, O 1s, C1s, N1s and S1s spectrum of the sample of ZCO@C<sub>3</sub>N<sub>4</sub>-S

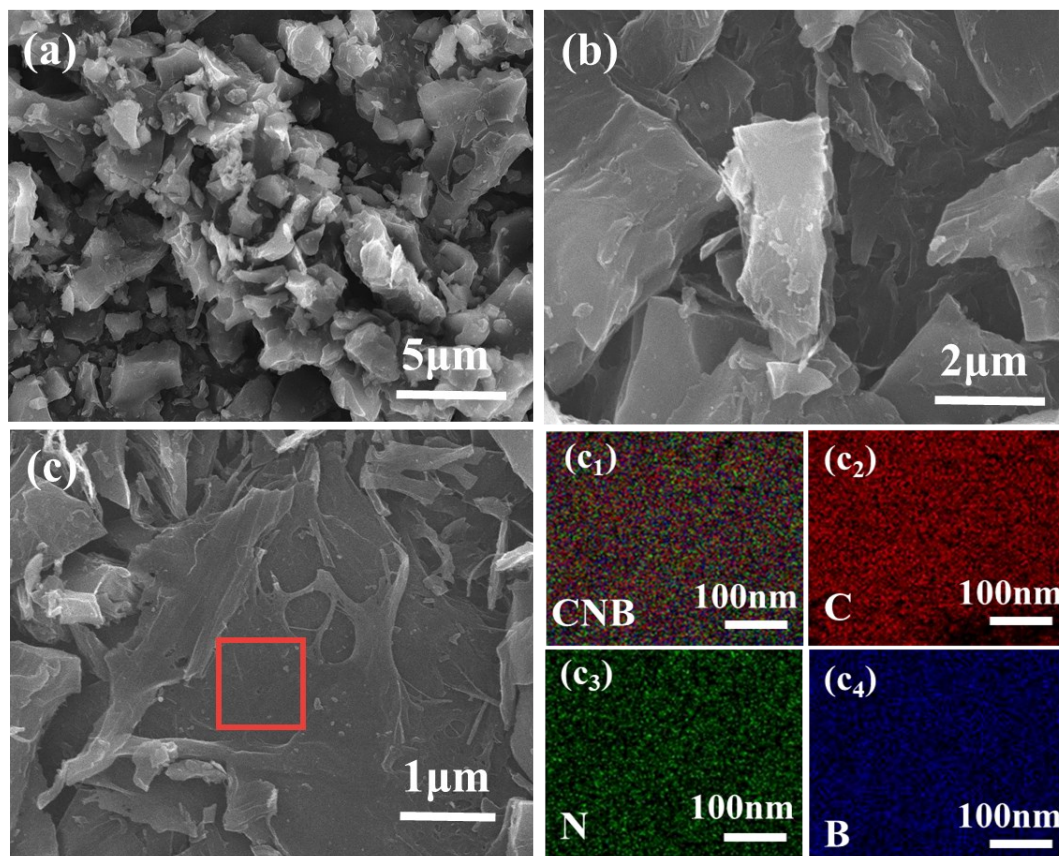

**Figure S3** (a-c) SEM images of g-C<sub>3</sub>N<sub>4</sub>, g-C<sub>3</sub>N<sub>4</sub>-S and g-C<sub>3</sub>N<sub>4</sub>-B; (c<sub>1</sub> - c<sub>4</sub>) SEM-EDS elemental mapping of C, N and B for the g-C<sub>3</sub>N<sub>4</sub>-B.

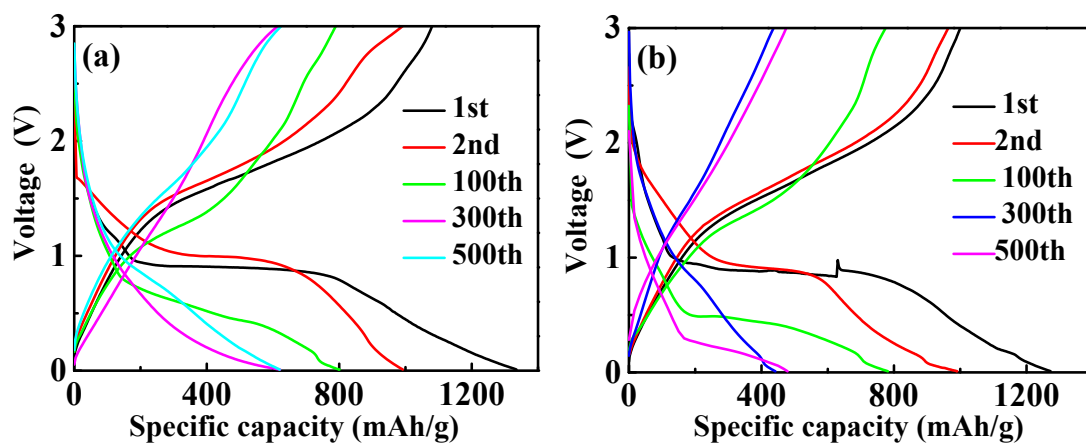

**Figure S4** (a/b) Charge and discharge profiles of ZCO@C<sub>3</sub>N<sub>4</sub> and ZCO@C<sub>3</sub>N<sub>4</sub>-B electrodes for the selected cycles (1st, 2nd, 100th, 300th and 500th)

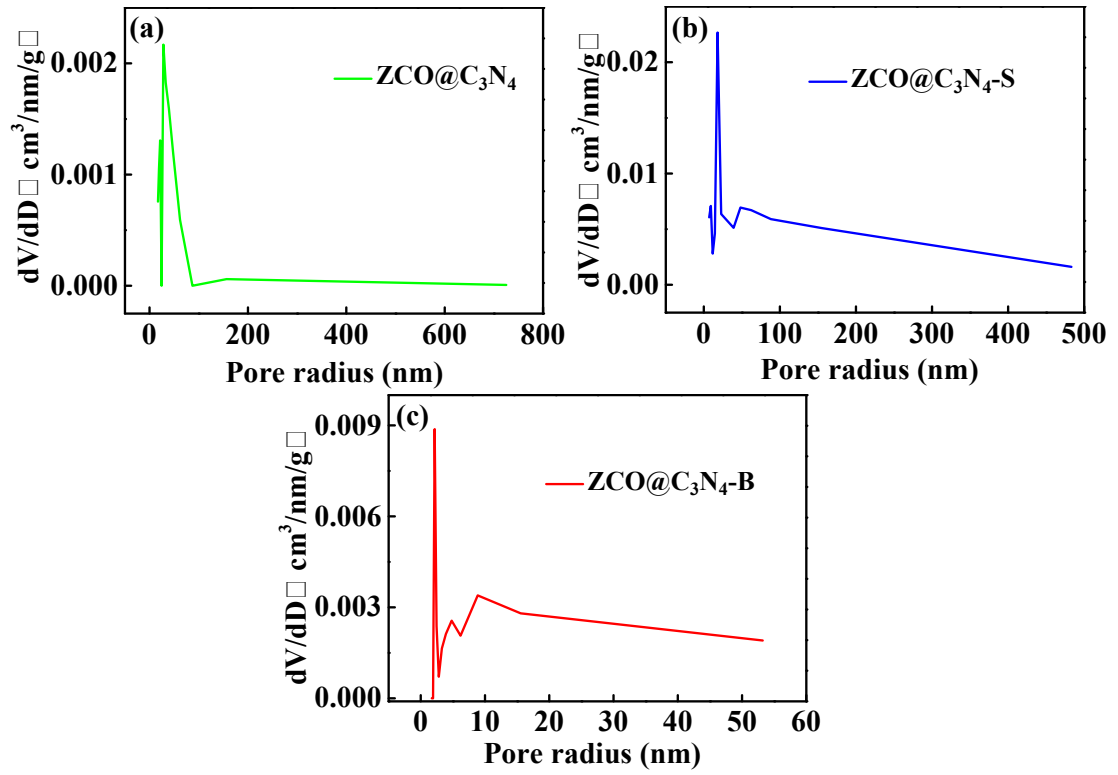

**Figure S5** Pore size distribution of ZCO@C<sub>3</sub>N<sub>4</sub>, ZCO@C<sub>3</sub>N<sub>4</sub>-S and ZCO@C<sub>3</sub>N<sub>4</sub>-B

B

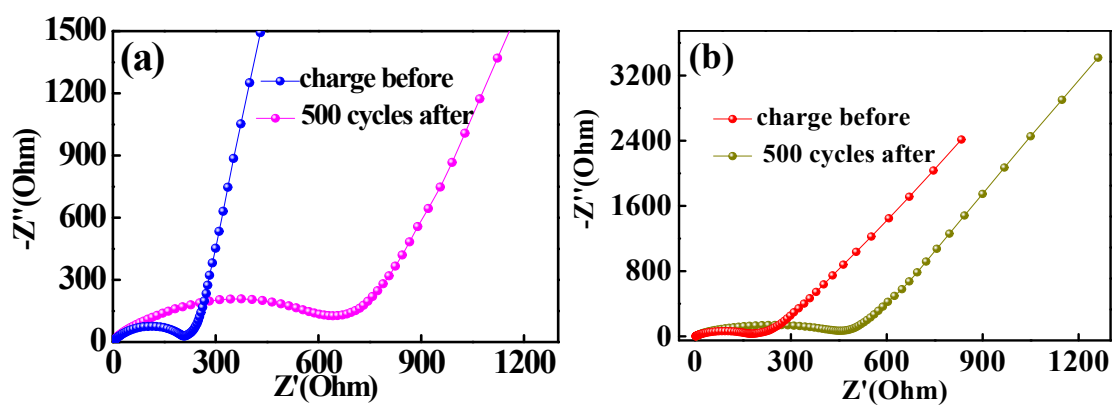

**Figure S6 (a/b)** Electrochemical impedance spectroscopy of the ZCO@C<sub>3</sub>N<sub>4</sub>, ZCO@C<sub>3</sub>N<sub>4</sub>-S electrodes after 500 cycles and charge before.
